# Supplementary material for: Investigation of Complement Component C4 Copy Number Variation in Human Longevity
Source: PubMed Central journal article supplement (PMC3899116; doi:10.1371/journal.pone.0086188), 2014-01-22
Supplement: pone.0086188.s001.pdf [file pone.0086188.s001.pdf]

# Investigation of complement component *C4* copy number variation in human longevity

## ST – Supplementary Tables

Supplementary Table S1a. Characteristics of samples

|                          |                                       | Cases   | Controls |
|--------------------------|---------------------------------------|---------|----------|
| <b>C4A</b>               | <b>Numbers before quality control</b> | 784     | 993      |
|                          | <b>Numbers after quality control</b>  | 724     | 923      |
|                          | <b>Age</b>                            |         |          |
|                          | Median                                | 101     | 53       |
|                          | IQR                                   | 97-101  | 41-62    |
|                          | Min – max                             | 94-110  | 19-75    |
| <b>Sex (male:female)</b> | 363:361                               | 491:432 |          |
| <b>C4B</b>               | <b>Smoking*</b>                       |         |          |
|                          | Smokers                               | 21      | 195      |
|                          | Non- smokers                          | 640     | 306      |
|                          | No information                        | 63      | 422      |
|                          | <b>Numbers before quality control</b> | 784     | 993      |
|                          | <b>Numbers after quality control</b>  | 728     | 920      |
| <b>C4C</b>               | <b>Age</b>                            |         |          |
|                          | Median                                | 101     | 53       |
|                          | IQR                                   | 97-101  | 41-62    |
|                          | Min – max                             | 94-110  | 19-75    |
|                          | <b>Sex (male:female)</b>              | 366:362 | 490:430  |
|                          | <b>Smoking*</b>                       |         |          |
| <b>C4S</b>               | Smokers                               | 22      | 194      |
|                          | Non-smokers                           | 643     | 302      |
|                          | No information                        | 63      | 424      |
|                          | <b>Numbers before quality control</b> | 784     | 993      |
|                          | <b>Numbers after quality control</b>  | 736     | 929      |
|                          | <b>Age</b>                            |         |          |
| Median                   | 101                                   | 53      |          |
| IQR                      | 97-101                                | 41-62   |          |
| Min – max                | 94-110                                | 19-75   |          |
| <b>Sex (male:female)</b> | 375:361                               | 493:436 |          |
| <b>C4S</b>               | <b>Smoking*</b>                       |         |          |
|                          | Smokers                               | 22      | 198      |
|                          | Non-smokers                           | 650     | 305      |
| No information           | 64                                    | 426     |          |

|                          |                                       |         |       |
|--------------------------|---------------------------------------|---------|-------|
| <b>C4L</b>               | <b>Numbers before quality control</b> | 784     | 993   |
|                          | <b>Numbers after quality control</b>  | 649     | 899   |
|                          | <b>Age</b>                            |         |       |
|                          | Median                                | 101     | 53    |
|                          | IQR                                   | 98-101  | 41-62 |
|                          | Min – max                             | 94-110  | 19-75 |
| <b>Sex (male:female)</b> | 321:328                               | 476:423 |       |
| <b>C4L replication</b>   | <b>Numbers before quality control</b> | 823     | 1202  |
|                          | <b>Numbers after quality control</b>  | 714     | 890   |
|                          | <b>Age</b>                            |         |       |
|                          | Median                                | 98      | 50    |
|                          | IQR                                   | 96-99   | 40-65 |
|                          | Min – max                             | 91-108  | 18-79 |
| <b>Sex (male:female)</b> | 59:655                                | 90:800  |       |

IQR: interquartile range, \*: “smokers” were defined as current smokers and recent ex-smokers (quit <3 years ago), “non-smokers” as never smokers and quit ≥3 years ago

For the C4L replication, smoking was not investigated.

**Supplementary Table S1b. Quality control of *C4A*, *C4B*, *C4S* and *C4L***

|                                    | <b><i>C4A</i></b> |          | <b><i>C4B</i></b> |          | <b><i>C4S</i></b> |          | <b><i>C4L</i></b> |          | <b><i>C4L</i> replication</b> |          |
|------------------------------------|-------------------|----------|-------------------|----------|-------------------|----------|-------------------|----------|-------------------------------|----------|
|                                    | Cases             | Controls | Cases             | Controls | Cases             | Controls | Cases             | Controls | Cases                         | Controls |
| Before qc                          | 784               | 993      | 784               | 993      | 784               | 993      | 784               | 993      | 823                           | 1202     |
| Replicate Number                   | 770               | 955      | 771               | 953      | 766               | 947      | 770               | 956      | 822                           | 1133     |
| Confidence                         | 745               | 937      | 757               | 945      | 755               | 937      | 663               | 903      | 716                           | 890      |
| Z score $\geq 2.65$                | 741               | 934      | 746               | 929      | 752               | 934      | 663               | 903      | 715                           | 890      |
| $2.65 > z \text{ score} \geq 1.75$ | 738               | 927      | 742               | 924      | 750               | 933      | 663               | 903      | 714                           | 890      |
| $C4A+C4B \neq C4L+C4S$             | 724               | 923      | 728               | 920      | 736               | 929      | 649               | 899      |                               |          |

Before qc: numbers before quality control

Replicate number: removal of all samples with analyzed replicate number 0, 1 or 2

Confidence: removal of all samples with confidence  $< 0.95$  and  $|\text{CN}_{\text{predicted}} - \text{CN}_{\text{calculated}}| > 0.3$

Z score  $\geq 2.65$ : removal of all samples with z score  $\geq 2.65$

$2.65 > z \text{ score} \geq 1.75$ : removal of all samples with  $2.65 > z \text{ score} \geq 1.75$  and  $|\text{CN}_{\text{predicted}} - \text{CN}_{\text{calculated}}| > 0.3$

$C4A+C4B \neq C4L+C4S$ : removal of all samples with sum of *C4A* copies plus *C4B* copies not equal to the sum of *C4L* copies plus *C4S* copies (not available for *C4L* replication)

**Supplementary Table S2. Frequencies of *C4A*, *C4S* and *C4L* copy numbers (absolute numbers are in parentheses)**

|                           | number of genes        | 0               | 1               | 2               | 3               | 4               | 5             | 6             | 10           | p value  |
|---------------------------|------------------------|-----------------|-----------------|-----------------|-----------------|-----------------|---------------|---------------|--------------|----------|
| <i>C4A</i>                | cases (LLI)<br>n = 724 | (5)<br>0.69%    | (118)<br>16.30% | (426)<br>58.84% | (156)<br>21.55% | (19)<br>2.62%   | (0)<br>0%     | (0)<br>0%     | (0)<br>0%    | 0.72     |
|                           | controls<br>n = 923    | (10)<br>1.08%   | (169)<br>18.31% | (517)<br>56.01% | (204)<br>22.10% | (22)<br>2.38%   | (1)<br>0.11%  | (0)<br>0%     | (0)<br>0%    |          |
| <i>C4S</i>                | cases (LLI)<br>n = 736 | (274)<br>37.23% | (342)<br>46.47% | (105)<br>14.27% | (13)<br>1.77%   | (1)<br>0.14%    | (1)<br>0.14%  | (0)<br>0%     | (0)<br>0%    | 0.51     |
|                           | controls<br>n = 929    | (317)<br>34.12% | (437)<br>47.04% | (158)<br>17.01% | (13)<br>1.40%   | (3)<br>0.32%    | (1)<br>0.11%  | (0)<br>0%     | (0)<br>0%    |          |
| <i>C4L</i>                | cases (LLI)<br>n = 649 | (1)<br>0.15%    | (32)<br>4.93%   | (172)<br>26.50% | (279)<br>42.99% | (154)<br>23.73% | (11)<br>1.69% | (0)<br>0%     | (0)<br>0%    | 0.00065  |
|                           | controls<br>n = 899    | (9)<br>1.00%    | (73)<br>8.12%   | (206)<br>22.91% | (328)<br>36.48% | (269)<br>29.92% | (13)<br>1.45% | (1)<br>0.11%  | (0)<br>0%    |          |
| <i>C4L</i><br>replication | cases (LLI)<br>n = 714 | (10)<br>1.40%   | (46)<br>6.44%   | (176)<br>24.65% | (273)<br>38.24% | (184)<br>25.77% | (14)<br>1.96% | (10)<br>1.40% | (1)<br>0.14% | 0.000021 |
|                           | controls<br>n = 890    | (9)<br>1.01%    | (80)<br>8.99%   | (273)<br>30.67% | (342)<br>38.43% | (171)<br>19.21% | (15)<br>1.69% | (0)<br>0%     | (0)<br>0%    |          |

p value: p value for the comparison of allele frequencies between long-lived cases and younger controls (Fisher's exact test)

**Supplementary Table S3. Results of the comparison of Q0 carrier state for the *C4B* gene with age groups as in Kramer et al. 1989 and Arason et al. 2003**

**a. Age distribution of cases and controls according to Kramer et al. 1989**

|                            | controls<br>≤53 years<br>n = 463 | cases (LLI)<br>61 - 110 years<br>n = 970 | p value |
|----------------------------|----------------------------------|------------------------------------------|---------|
| <i>C4B</i> *Q0<br>carriers | n = 118<br>25.49%                | n = 265<br>27.32%                        | 0.48    |

**b. Age distribution of cases and controls according to Arason et al. 2003**

|                            | controls<br>≤54 years<br>n = 487 | cases (LLI)<br>55 - 110 years<br>n = 1161 | p value |
|----------------------------|----------------------------------|-------------------------------------------|---------|
| <i>C4B</i> *Q0<br>carriers | n = 125<br>25.67%                | n = 317<br>27.30%                         | 0.50    |

p value: p value for the comparison of *C4B*\*Q0 frequencies between long-lived cases and younger controls (Fisher's exact test)

**Supplementary Table S4. Results of the comparison of Q0 carrier state for the *C4L* gene (carrier and non-carrier information)**

|                                            | ≤ 45<br>n = 294                   | 46 - 60<br>n = 351 | 61 - 75<br>n = 254 | 94 - 100<br>n = 233                | > 100<br>n = 416  | p value                                                  |
|--------------------------------------------|-----------------------------------|--------------------|--------------------|------------------------------------|-------------------|----------------------------------------------------------|
| <i>C4L</i> * <i>Q0</i><br>carriers         | n = 29<br>9.86%                   | n = 32<br>9.12%    | n = 21<br>8.27%    | n = 11<br>4.72%                    | n = 22<br>5.29%   | p_contr_trend = 0.52<br>p_case = 0.85<br>p_trend = 0.004 |
|                                            | all controls<br>n = 82<br>9.12%   |                    |                    | all cases (LLI)<br>n = 33<br>5.08% |                   | p_case_contr = 0.003                                     |
| <i>C4L</i> * <i>Q0</i><br>non-<br>carriers | n = 265<br>90.14%                 | n = 319<br>90.88%  | n = 233<br>91.73%  | n = 222<br>95.28%                  | n = 394<br>94.71% |                                                          |
|                                            | all controls<br>n = 817<br>90.88% |                    |                    | cases (LLI)<br>n = 616<br>95.92%   |                   |                                                          |

p\_case\_contr: p value for the comparison of *C4L*\**Q0* frequencies between long-lived cases and younger controls (Fisher's exact test; primary endpoint)

p\_contr\_trend: p value for trend test of *C4L*\**Q0* frequencies in the three control subgroups (Armitage trend test; secondary endpoint)

p\_case: p value for the comparison of *C4L*\**Q0* frequencies in the two case subgroups (Fisher's exact test; secondary endpoint)

p\_trend: p value for trend test of *C4L*\**Q0* frequencies in all five age groups (Armitage trend test; secondary endpoint)

**Supplementary Table S5. Results Replication study in additional German sample: Results of the comparison of Q0 carrier state for the *C4L* gene (carrier and non-carrier information)**

|                                            | ≤ 45<br>n = 344                   | 46 - 60<br>n = 248 | 61 - 79<br>n = 298 | 91 - 108*<br>n = 714             |                  | p value                                |
|--------------------------------------------|-----------------------------------|--------------------|--------------------|----------------------------------|------------------|----------------------------------------|
| <i>C4L</i> * <i>Q0</i><br>carriers         | n = 41<br>11.92%                  | n = 25<br>10.08%   | n = 23<br>7.72%    |                                  |                  | p_contr_trend = 0.08<br>p_trend = 0.03 |
|                                            | all controls<br>n = 89<br>10.00%  |                    |                    | cases (LLI)<br>n = 56<br>7.84%   |                  | p_case_contr = 0.14                    |
| <i>C4L</i> * <i>Q0</i><br>non-<br>carriers | n = 303<br>88.08%                 | n = 223<br>89.92%  | n = 275<br>92.28%  | n = 577<br>92.62%                | n = 81<br>89.01% |                                        |
|                                            | all controls<br>n = 801<br>90.00% |                    |                    | cases (LLI)<br>n = 658<br>92.16% |                  |                                        |

\* due to the small number of centenarians in the replication sample we did not subdivide the case sample into a nonagenarian and centenarian subgroup

For abbreviations see legend to Supplementary Table 4.

**Supplementary Table S6. Replication study in additional German sample: Results of the comparison of Q0 carrier state for the *C4L* gene with age groups as in the initial study**

|                         | ≤ 45<br>n = 344                  | 46 - 60<br>n = 248 | 61 - 75<br>n = 254 | 94 - 108*<br>n = 707           | p value                              |
|-------------------------|----------------------------------|--------------------|--------------------|--------------------------------|--------------------------------------|
| <i>C4L</i> *Q0 carriers | n = 41<br>11.92%                 | n = 25<br>10.08%   | n = 19<br>7.48%    |                                | p_contr_trend = 0.08<br>p_trend=0.03 |
|                         | all controls<br>n = 85<br>10.05% |                    |                    | cases (LLI)<br>n = 56<br>7.92% | p_case_contr = 0.16                  |

For abbreviations see legend to Supplementary Table 4.
